# Supplementary material for: Accommodating sodium into three-dimensional hosts with a nanoscale sodiophilic layer towards stable pre-stored Na metal anodes
Source: Royal Society of Chemistry journal article supplement (doi:10.1039/d1qm00888a), 2021-01-01
Supplement: d1qm00888a1.pdf [file d1qm00888a1.pdf]

**Accommodating sodium into three-dimensional hosts with a  
nanoscale sodiophilic layer towards stable pre-stored Na  
metal anodes**

Juli Liang, Wenwei Wu, Yang Chao, Yilong Li, Junfei Wu, Yulu Xie, Xuehang Wu\*

*Guangxi Key Laboratory of Processing for Non-ferrous Metals and Featured Materials, School of  
Chemistry and Chemical Engineering, Guangxi University, Nanning 530004, PR China*

Corresponding author. E-mail: xhwu@gxu.edu.cn (X. Wu)

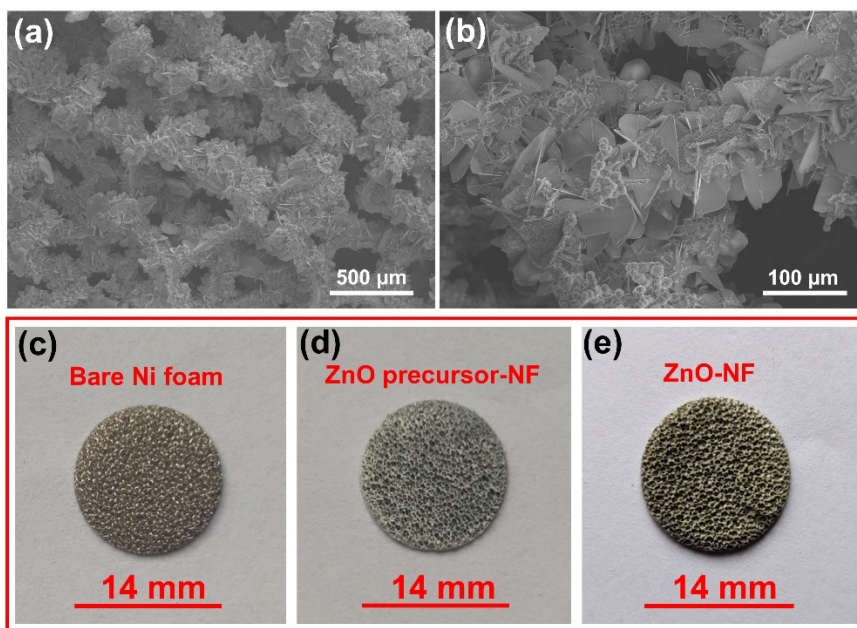

**Fig. S1.** (a,b) SEM images of ZnO precursor-NF. Digital images of (c) bare Ni foam, (d) ZnO precursor-NF, and (e) ZnO-NF.

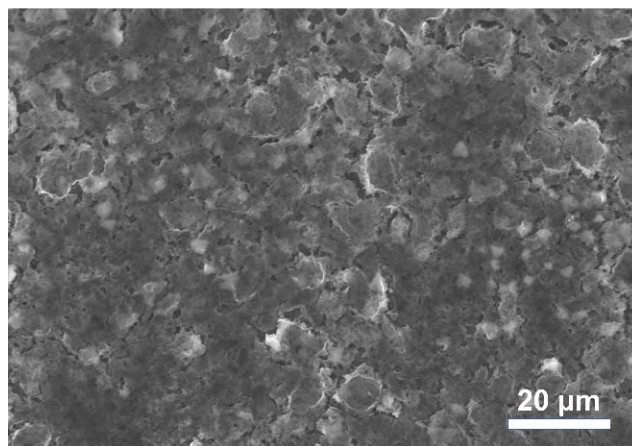

**Fig. S2.** SEM image of Na-NF.

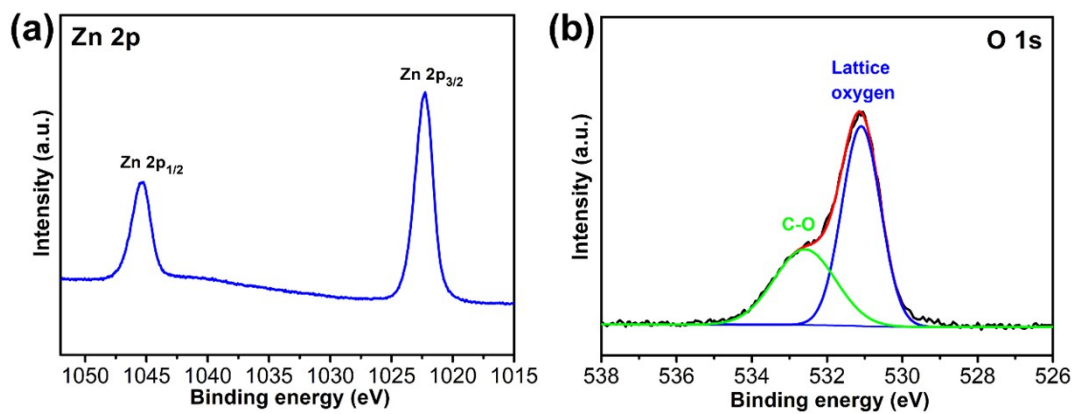

**Fig. S3.** High-resolution (a) Zn 2p and (b) O 1s XPS spectra of ZnO-NF.

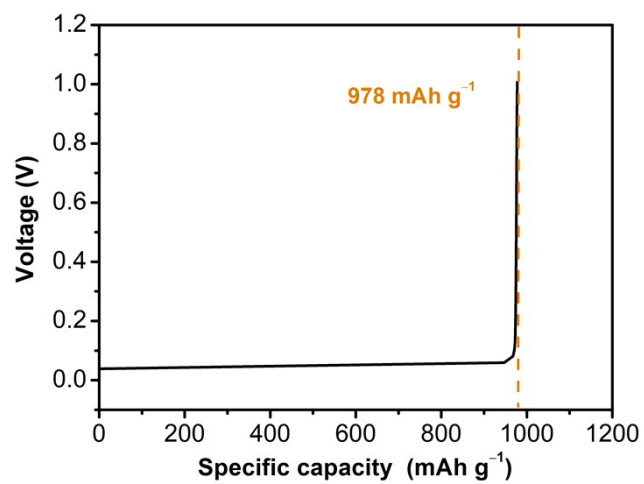

**Fig. S4.** Galvanostatic stripping voltage profile of Na-Zn-NF. The current density was  $1 \text{ mA cm}^{-2}$  and the cut-off voltage was 1.0 V.

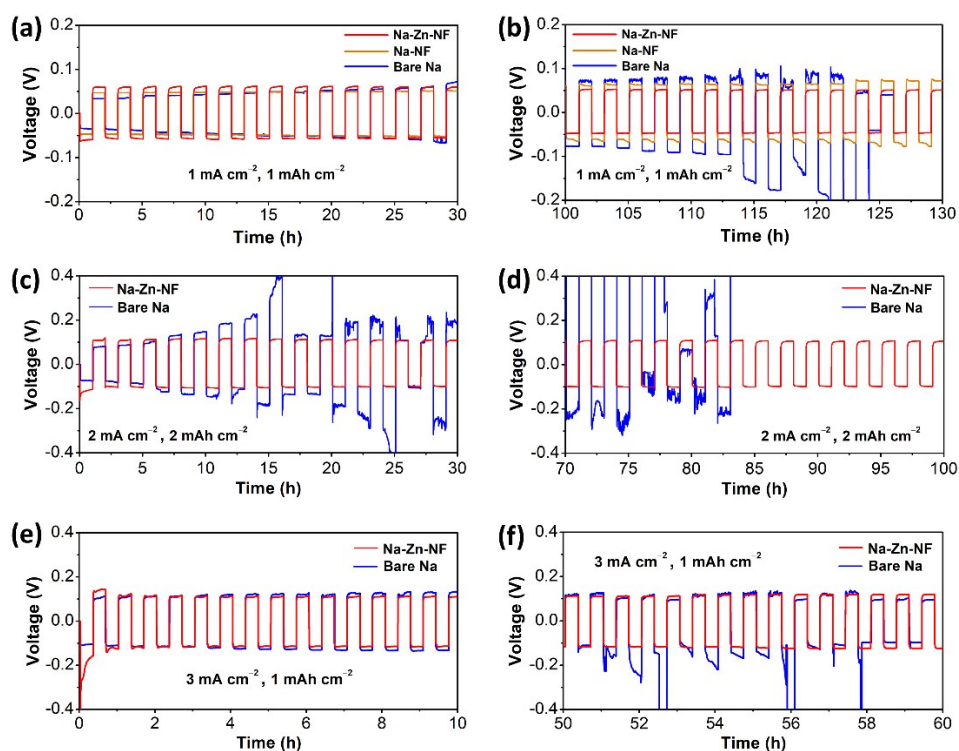

**Fig. S5.** (a,b) Enlarged voltage profiles of the Na-Zn-NF, Na-NF, and bare Na symmetric cells at a current density of  $1 \text{ mA cm}^{-2}$  with a capacity of  $1 \text{ mAh cm}^{-2}$ . Enlarged voltage profiles of the Na-Zn-NF and bare Na symmetric cells (c,d) at a current density of  $2 \text{ mA cm}^{-2}$  with a capacity of  $2 \text{ mAh cm}^{-2}$  and (e,f) at a current density of  $3 \text{ mA cm}^{-2}$  with a capacity of  $1 \text{ mAh cm}^{-2}$ .

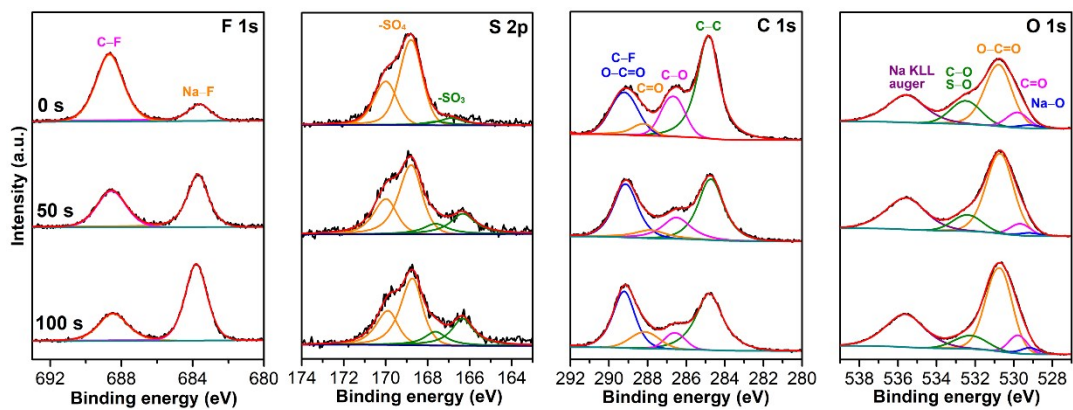

**Fig. S6.** F 1s, S 2p, C 1s, and O 1s XPS spectra of the cycled Na-NF before (0 s) and after etching for 50 s and 100 s.

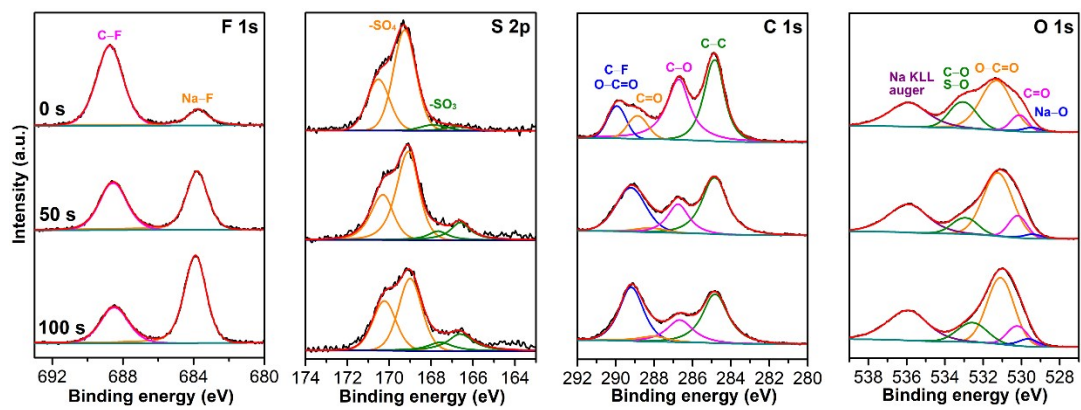

**Fig. S7.** F 1s, S 2p, C 1s, and O 1s XPS spectra of the cycled bare Na before (0 s) and after etching for 50 s and 100 s.



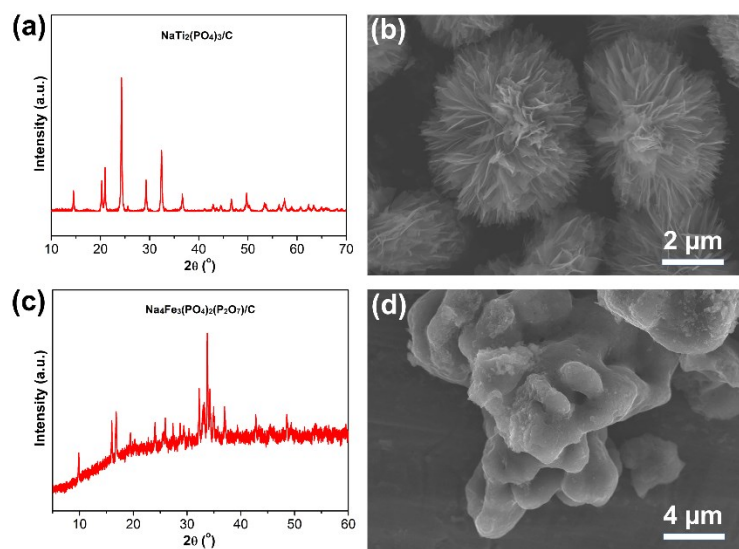

**Fig. S8.** (a) XRD pattern and (b) SEM image of  $\text{NaTi}_2(\text{PO}_4)_3/\text{C}$ . (c) XRD pattern and (d) SEM image of  $\text{Na}_4\text{Fe}_3(\text{PO}_4)_2(\text{P}_2\text{O}_7)/\text{C}$ .

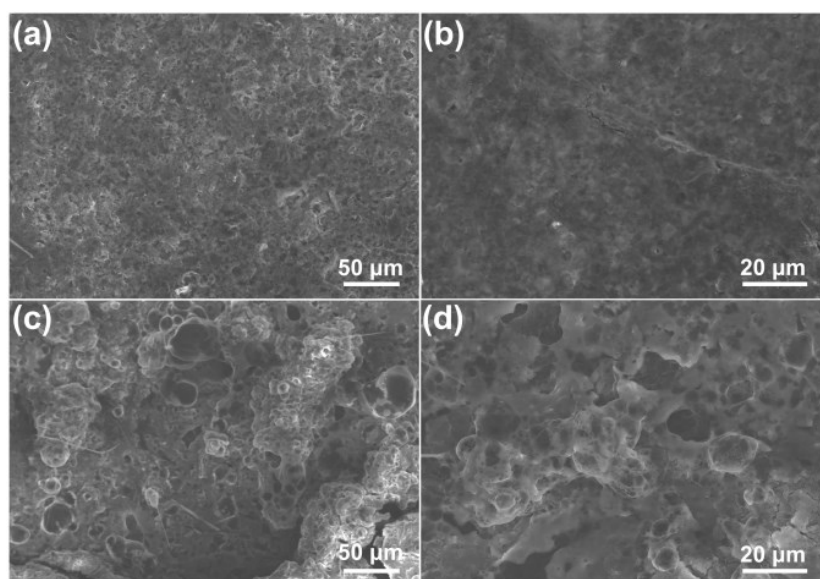

**Fig. S9.** SEM images of the Na-Zn-NF after 1000 cycles and the bare Na after 600 cycles in full cells.

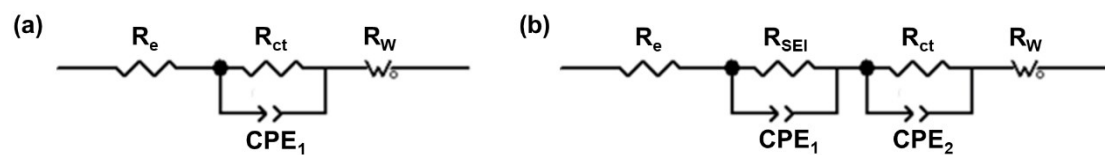

**Fig. S10.** Equivalent circuits used to fit the Nyquist plots of the Na-Zn-NF, Na-NF, and bare Na symmetric cells (a) before and (b) after 50 cycles.

**Table S1.** Masses of ZnO-NF, Na-Zn-NF, and Na in Na-Zn-NF. Three representative

|          | ZnO-NF  | Na-Zn-NF | Na in Na-Zn-NF |
|----------|---------|----------|----------------|
| Sample 1 | 53.1 mg | 102.4 mg | 49.3 mg        |
| Sample 2 | 53.4 mg | 103.1 mg | 49.7 mg        |
| Sample 3 | 53.3 mg | 102.7 mg | 49.4 mg        |
| Average  | 53.3 mg | 102.7 mg | 49.5 mg        |

groups of samples are selected.

**Table S2.** Comparison of cycling performance between Na-Zn-NF and other state-of-the-art Na metal anodes.

| Materials                                    | Capacity<br>(mAh<br>cm <sup>-2</sup> ) | Current<br>density<br>(mA cm <sup>-2</sup> ) | Cycles                              | Time<br>(h)                          | Electrolyte                                                    | Ref.                       |
|----------------------------------------------|----------------------------------------|----------------------------------------------|-------------------------------------|--------------------------------------|----------------------------------------------------------------|----------------------------|
| Na-Zn-NF                                     | <b>1</b><br><b>2</b>                   | <b>1</b><br><b>2</b>                         | <b>&gt; 1000</b><br><b>&gt; 550</b> | <b>&gt; 2000</b><br><b>&gt; 1100</b> | <b>1 M NaCF<sub>3</sub>SO<sub>3</sub></b><br><b>in diglyme</b> | <b>This</b><br><b>work</b> |
| Na carbonized wood                           | 1                                      | 1                                            | > 250                               | > 500                                | 1 M NaClO <sub>4</sub> in EC/DEC                               | 1                          |
| Na/Ni foam                                   | 1                                      | 1                                            | > 300                               | > 600                                | 1 M NaPF <sub>6</sub> in DEGDME                                | 2                          |
| Na@oxygen-treated Cu foam                    | 1<br>1                                 | 0.5<br>1                                     | > 100<br>> 100                      | > 400<br>> 200                       | 1 M NaClO <sub>4</sub> in EC/DEC                               | 3                          |
| Na/3D flexible carbon Felt                   | 2                                      | 1                                            | > 120                               | > 480                                | 1 M NaClO <sub>4</sub> in EC/PC                                | 4                          |
| Na@CP-NCNTs                                  | 1<br>1                                 | 1<br>3                                       | > 175<br>> 270                      | > 350<br>> 180                       | 1 M NaPF <sub>6</sub> in EC/PC                                 | 5                          |
| Na-carbon cloth composite                    | 1                                      | 1                                            | > 100                               | > 200                                | 1 M NaCF <sub>3</sub> SO <sub>3</sub> in DME                   | 6                          |
| Na-carbon fiber                              | 1                                      | 0.5                                          | > 150                               | > 300                                | 1 M NaClO <sub>4</sub> in EC/DMC/EMC with 5% FEC               | 7                          |
| Na-Sn alloy/Na <sub>2</sub> O                | 1<br>1                                 | 1<br>2                                       | > 350<br>> 500                      | > 700<br>> 500                       | 1 M NaCF <sub>3</sub> SO <sub>3</sub> in diglyme               | 8                          |
| Na-Na <sub>2</sub> S-carbonized tissue paper | 0.5                                    | 1                                            | > 300                               | > 300                                | NaClO <sub>4</sub> in EC/DEC with 10% FEC                      | 9                          |

**Table S3.** Percentages of F, S, C, and O elements detected at different depths of SEI films on the cycled Na-Zn-NF, Na-NF, and bare Na.

| Electrodes | Etching time (s) | Percentages (%) |      |       |       |
|------------|------------------|-----------------|------|-------|-------|
|            |                  | F               | S    | C     | O     |
| Na-Zn-NF   | 0                | 11.82           | 3.30 | 16.70 | 68.18 |
|            | 50               | 9.49            | 3.22 | 13.20 | 74.09 |
|            | 100              | 9.82            | 3.11 | 12.31 | 74.76 |
| Na-NF      | 0                | 11.98           | 2.77 | 19.28 | 65.97 |
|            | 50               | 11.47           | 2.65 | 15.21 | 70.67 |
|            | 100              | 12.48           | 2.74 | 13.92 | 70.86 |
| Bare Na    | 0                | 13.93           | 2.87 | 18.84 | 64.36 |
|            | 50               | 14.14           | 3.04 | 14.57 | 68.25 |
|            | 100              | 15.45           | 2.92 | 13.13 | 68.50 |

## References

- 1 W. Luo, Y. Zhang, S. Xu, J. Dai, E. Hitz, Y. Li, C. Yang, C. Chen, B. Liu and L. Hu, Encapsulation of metallic Na in an electrically conductive host with porous channels as a highly stable Na metal anode, *Nano Lett.*, 2017, **17**, 3792–3797.
- 2 Q. Lu, X. Wang, A. Omar and D. Mikhailova, 3D Ni/Na metal anode for improved sodium metal batteries, *Mater. Lett.*, 2020, **275**, 128206.
- 3 C. Wang, H. Wang, E. Matios, X. Hu and W. Li, A chemically engineered porous copper matrix with cylindrical core-shell skeleton as a stable host for metallic sodium anodes, *Adv. Funct. Mater.*, 2018, **28**, 1802282.
- 4 S. S. Chi, X. G. Qi, Y. S. Hu and L. Z. Fan, 3D flexible carbon felt host for highly stable sodium metal anodes, *Adv. Energy Mater.*, 2018, **8**, 1702764.
- 5 Y. Zhao, X. Yang, L. Y. Kuo, P. Kaghazchi, Q. Sun, J. Liang, B. Wang, A. Lushington, R. Li, H. Zhang and X. Sun, High capacity, dendrite-free growth, and minimum volume change Na metal anode, *Small*, 2018, **14**, 1703717.
- 6 W. Go, M. H. Kim, J. Park, C. H. Lim, S. H. Joo, Y. Kim and H. W. Lee, Nanocrevasse-rich carbon fibers for stable lithium and sodium metal anodes, *Nano Lett.*, 2019, **19**, 1504–1511.
- 7 Y. Zhang, C. Wang, G. Pastel, Y. Kuang, H. Xie, Y. Li, B. Liu, W. Luo, C. Chen and

- L. Hu, 3D wettable framework for dendrite-free alkali metal anodes, *Adv. Energy Mater.*, 2018, **8**, 1800635.
- 8 X. Zheng, W. Yang, Z. Wang, L. Huang, S. Geng, J. Wen, W. Luo and Y. Huang, Embedding a percolated dual-conductive skeleton with high sodiophilicity toward stable sodium metal anodes, *Nano Energy*, 2020, **69**, 104387.
- 9 W. Wu, S. Hou, C. Zhang and L. Zhang, A dendrite-free Na-Na<sub>2</sub>S-carbon hybrid toward a highly stable and superior sodium metal anode, *ACS Appl. Mater. Interfaces*, 2020, **12**, 27300–27306.
